# Supplementary material for: Interoperability between clinical electronic patient record and social prescribing systems: The Life Rooms service evaluation
Source: Research Square preprint supplement (doi:10.21203/rs.3.rs-7253756/v1), 2025-08-11
Supplement: Supplementary file 1 [file 5924d2e429e1b726d6022f80.pdf]

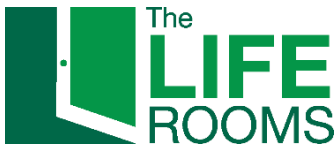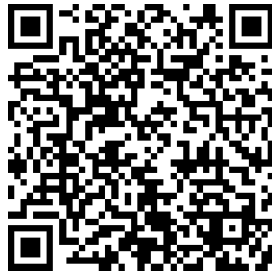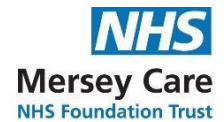

Community and Mental Health Services

The following questionnaire asks some questions related to your experience of The Life Rooms and the Rio/Elemental Interoperability. This will only take a few minutes to complete, and your responses will be kept anonymous.

We will use your feedback to evaluate and improve the service. By completing this questionnaire, you agree to your responses being used for these purposes. If you would like further information, please contact [liferoomsresearch@merseycare.nhs.uk](mailto:liferoomsresearch@merseycare.nhs.uk).

Thank you very much for your time in completing this questionnaire.

<https://eu.surveymonkey.com/r/CD5QZ7G>

### The Life Rooms Mid Mersey Staff Survey

**1. Where do you currently work?**

- ☐ Halton
- ☐ Warrington
- ☐ St Helens
- ☐ Knowsley

The following questions are about your experience of supporting service users *before* being able to refer to The Life Rooms service:

**2. *Prior* to having access to The Life Rooms service and this interoperability of systems, how much of your time was spent meeting the social needs of the service users you work with?**

(Estimate of average time spent per appointment)

\_\_\_\_\_ minutes

3. Please rate how confident you felt in meeting the social needs of the service users you work with?

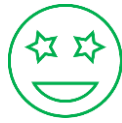

Very  
Confident

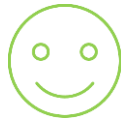

Fairly  
Confident

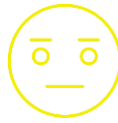

Okay

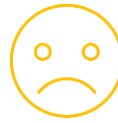

Fairly  
unconfident

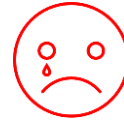

Very  
unconfident

The following questions are about your experience of supporting service users *since* referring into The Life Rooms service was introduced:

4. *Since* having access to The Life Rooms service, how much of your time is spent meeting social needs of the service users you work with?  
(Estimate of average time spent per appointment)

\_\_\_\_\_ minutes

5. Please rate how confident you now feel in meeting the social needs of the service users you work with?

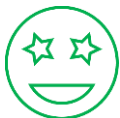

Very  
Confident

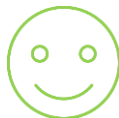

Fairly  
Confident

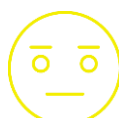

Okay

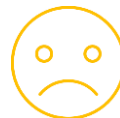

Fairly  
unconfident

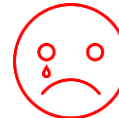

Very  
Unconfident

6. a) How beneficial has it been to access referral notes and updates from The Life Rooms in relation to service users you have referred?

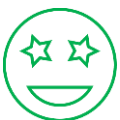

Very  
Beneficial

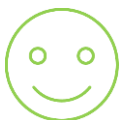

Fairly  
Beneficial

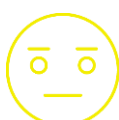

No  
Difference

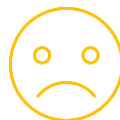

Not Very  
Beneficial

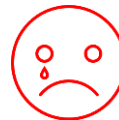

Not Beneficial  
At All

**b) Please give reasons for your answer:**

---

---

---

---

**7. How satisfied are you with The Life Rooms service?**

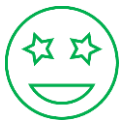

Very  
Satisfied

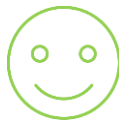

Fairly  
Satisfied

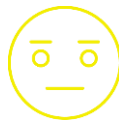

Not Sure

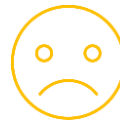

Fairly  
Unsatisfied

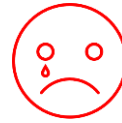

Very  
Unsatisfied

**8. a) What do you think the impact would be on your clinical practice *if you could no longer refer into The Life Rooms service?***

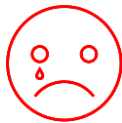

Very  
Negative  
Impact

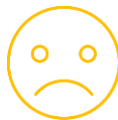

Negative  
Impact

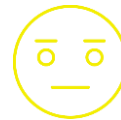

No  
Impact

**b) Please give reasons for your answer:**

---

---

---

---

---

---

**9.The Life Rooms as an organisation has wraparound governance to ensure the safety of service users. Do you feel confident/assured when referring a patient to The Life Rooms that they will receive high quality care?**

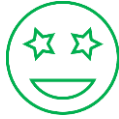

Very  
Assured

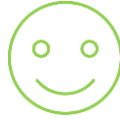

Assured

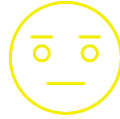

Not Sure

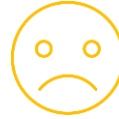

Not Assured

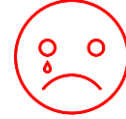

Very  
Unassured

**10.How likely are you to recommend The Life Rooms service to your colleagues or other services?**

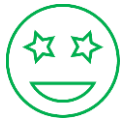

Extremely  
Likely

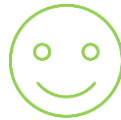

Likely

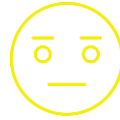

Not Sure

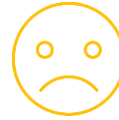

Unlikely

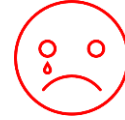

Very  
Unlikely

**11.Please provide any additional comments or feedback below:**

---

---

---

---

---

---

---

**Thank you for taking the time to complete this survey.**
