# Supplementary material for: Interoperability between clinical electronic patient record and social prescribing systems: The Life Rooms service evaluation
Source: Research Square preprint supplement (doi:10.21203/rs.3.rs-7253756/v1), 2025-08-11
Supplement: Supplementary file 2 [file 6cd0bd9ce335227cbf185a23.pdf]

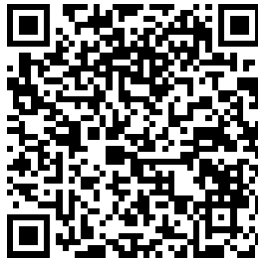

You accessed some support recently which was provided by The Life Rooms.

The following questionnaire asks some questions related to the support you received. This will only take a few minutes to complete, and your responses will be kept anonymous.

We will use your feedback to evaluate and improve the service. By completing this questionnaire, you agree to your responses being used for these purposes. If you would like further information, please contact [liferoomsresearch@merseycare.nhs.uk](mailto:liferoomsresearch@merseycare.nhs.uk).

Thank you very much for your time in completing this questionnaire.

<https://eu.surveymonkey.com/r/CDNCK7J>

1. Your Name (optional) \_\_\_\_\_

2. Where did you access the Life Rooms Services?

- |                                                          |                                                             |                                                      |
|----------------------------------------------------------|-------------------------------------------------------------|------------------------------------------------------|
| <input type="checkbox"/> St Helens Saints Totally Wicked | <input type="checkbox"/> St Helens Library (World of Glass) | <input type="checkbox"/> Harry Blackman House        |
| <input type="checkbox"/> Halewood Library                | <input type="checkbox"/> Chester Lane Library               | <input type="checkbox"/> St Helens Millennium Centre |
| <input type="checkbox"/> Huyton Library                  | <input type="checkbox"/> Newton Le Willows Library          | <input type="checkbox"/> Halton Lea Library          |
| <input type="checkbox"/> Prescott Library                | <input type="checkbox"/> Stockbridge Village Library        | <input type="checkbox"/> Bluebell Centre             |
| <input type="checkbox"/> Parr Library                    | <input type="checkbox"/> Kirkby Library                     | <input type="checkbox"/> Halewood Volair Centre      |
| <input type="checkbox"/> Rainhill Library                | <input type="checkbox"/> The Gateway Warrington             | <input type="checkbox"/> Stockbridge Volair Centre   |
| <input type="checkbox"/> Haydock Library                 | <input type="checkbox"/> Widnes Library                     | <input type="checkbox"/> Huyton Volair Centre        |
| <input type="checkbox"/> Eccleston Library               |                                                             | <input type="checkbox"/> Kirkby Volair Centre        |

How much do you agree or disagree with the following statements?

3. Accessing The Life Rooms service was easy for me:

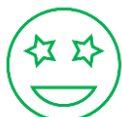

Strongly Agree

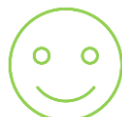

Agree

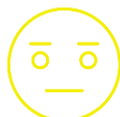

Not Sure

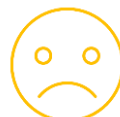

Disagree

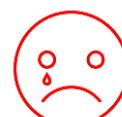

Strongly Disagree

**4. It was easy to discuss my concerns with Life Rooms staff:**

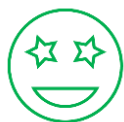

Strongly  
Agree

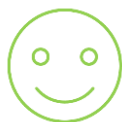

Agree

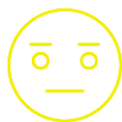

Not Sure

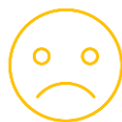

Disagree

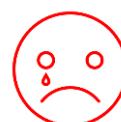

Strongly  
Disagree

**5.What did you find helpful about The Life Rooms?**

---

---

---

---

**6.What did you find unhelpful about The Life Rooms?**

---

---

---

---

**7.Would you recommend The Life Rooms service to a friend or family member?**

☐ Yes

☐ No

Why / Why not?

---

---

---

**8.Is there anything else you would like to have been provided with by The Life Rooms?**

☐ No, The Life Rooms provided all the support I was looking for

☐ Yes (please state)

---

---

---

Thank you for completing the first part of this questionnaire.

*The final few questions will ask about the effect that the support you received had on different areas of your life, if you are happy to complete these further questions, please continue to the next page...*

Please describe the effect that The Life Rooms has had on:

**9. Your mental wellbeing (Levels of anxiety, low mood, stress)**

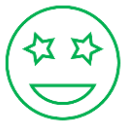

Very  
positive  
effect

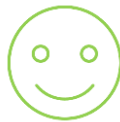

Positive  
effect

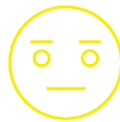

No effect

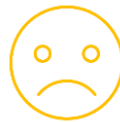

Negative  
effect

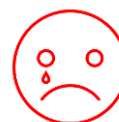

Very  
negative  
effect

**10. Feeling supported (Feeling that you are not alone, that you have somewhere to turn to)**

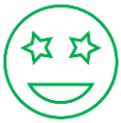

Very  
positive  
effect

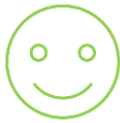

Positive  
effect

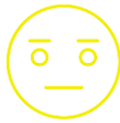

No effect

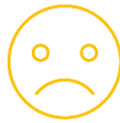

Negative  
effect

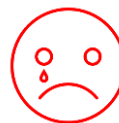

Very  
negative  
effect

**11. Building relationships (Feeling less isolated / lonely, making friends, socialising)**

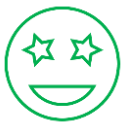

Very  
positive  
effect

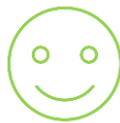

Positive  
effect

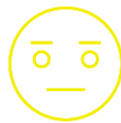

No effect

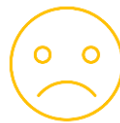

Negative  
effect

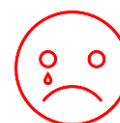

Very  
negative  
effect

**12. Social/practical circumstances (Finance, housing, etc.)**

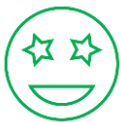

Very  
positive  
effect

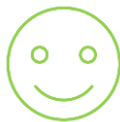

Positive  
effect

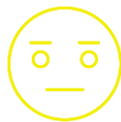

No effect

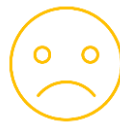

Negative  
effect

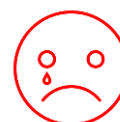

Very  
negative  
effect

**13.Are there any further comments you would like to make about your experience with The Life Rooms...?**

---

---
