# Supplementary material for: Interoperability between clinical electronic patient record and social prescribing systems: The Life Rooms service evaluation
Source: Research Square preprint supplement (doi:10.21203/rs.3.rs-7253756/v1), 2025-08-11
Supplement: Supplementary file 3 [file e2a9ce896c7b36d72eeb7721.pdf]

# The Life Rooms Evaluation

## Case Study Information Sheet

We would like to hear from people who have used The Life Rooms services about their experiences of doing so and how it has impacted them.

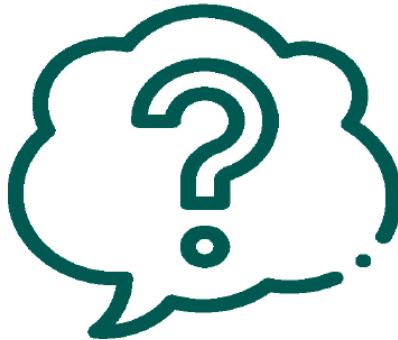

### What is a case study?

Simply put, a 'case study' is us asking you to tell us about your experience of using The Life Rooms services. You can provide as little or as much information as you would like, the template offers some suggestions of the kind of things you might want to include. You can do this in writing yourself, or you can get in touch with us, and we can speak with you over the phone or in-person and write it down for you.

### What will it be used for?

The information you provide will be used for sharing information about The Life Rooms. It is important to note that your name will **NEVER** be shared with any information you provide in the case study.

Some examples of what we might use case studies for:

- Evaluation of The Life Rooms services
- Promotional/marketing material for The Life Rooms
- Supporting information for funding bids
- Supporting information for award nominations
- Presentations for conferences and events

### How will my information be stored?

A written account of your experiences with The Life Rooms will be saved electronically on a secure drive. Only authorised members of The Life Rooms staff will be able to access this information.

**If you have any questions or would like more information, please contact us on:**

Email: [liferoomsresearch@merseycare.nhs.uk](mailto:liferoomsresearch@merseycare.nhs.uk)

Telephone: 0151 478 6556 (ask to speak to the Research Team)

## Mid Mersey Service User Case Study

Survey Monkey Link: <https://eu.surveymonkey.com/r/CDNXZX7>

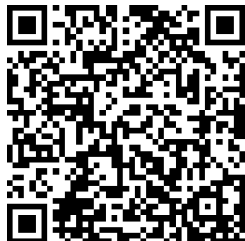

**Name** (Optional)

**1. Can you tell us about your experience with The Life Rooms?**

Please tell us as much information as you can. You can include anything you like, for example:

- How did you hear about The Life Rooms and what brought you there?
- Which services did you access and what support did you get?
- How helpful was the service?
- What effect has the support you received had on you / your life?
- Where would you go for support if The Life Rooms wasn't available?

This image shows a blank sheet of white paper with horizontal ruling lines. The lines are evenly spaced and run across the width of the page. There are no margins, text, or other markings on the paper.

This image shows a blank sheet of white paper with horizontal ruling lines. The lines are evenly spaced and extend across the width of the page. There are no margins, text, or other markings on the paper.

## Anything further?

*Please use this space to tell us anything else you wish to document in relation to your experiences at The Life Rooms. This may include anything that hasn't been covered above, or any suggestions for improvements/changes to the service.*

[illegible]

## Case Study Consent Form

Completing a case study is voluntary, and it is entirely your decision whether or not you would like to do so.

Please make sure you have read and understood the information included in this document (give us a call if you want to chat about it first). In order to let us know that you are happy to provide your feedback, please complete the section below:

**Please write your initial in the box:**

1. I have read and understood the information sheet in relation to the above. I have had a chance to think through this information, ask questions, and have my questions answered. ☐
2. I understand that taking part is voluntary and I can withdraw my account at any time, without my care or legal rights being affected. ☐

**Question 3 is about how you would be happy for us to use your information (remember, your name will never be used). You can tick all boxes, or just tick the ones you are happy with, and leave the others blank.**

3. I agree to sharing a written account of my experience at The Life Rooms for the purpose of:
  - Evaluation of The Life Rooms services
  - Promotional/marketing material for The Life Rooms – Internal (within Mersey Care)
  - Promotional/marketing material for The Life Rooms – External (outside Mersey Care)
  - Promotional and marketing material for The Life Rooms – on social media
  - Supporting information for funding bids
  - Supporting information for award nominations
  - Presentations for conferences and events

|                          |
|--------------------------|
| <input type="checkbox"/> |

\_\_\_\_\_  
Your Name

\_\_\_\_\_  
Date

\_\_\_\_\_  
Signature

\_\_\_\_\_  
Name of person taking consent  
(if you are completing on your own,  
please leave this blank)

\_\_\_\_\_  
Date

\_\_\_\_\_  
Signature

**Thank you very much for your time!**
